# Supplementary material
Source: PubMed Central journal article supplement (PMC1895824)
Supplement: blood_2005-10-4004_1.pdf [file blood_2005-10-4004_1.pdf]

| <b>Appendix 1: 2891 de novo patient outcomes from study entry</b> |                      |         |                       |         |                                           |         |                                |         |                                          |         |                                |         |
|-------------------------------------------------------------------|----------------------|---------|-----------------------|---------|-------------------------------------------|---------|--------------------------------|---------|------------------------------------------|---------|--------------------------------|---------|
|                                                                   | <b>Overall</b>       |         |                       |         | <b>Intensive Timing Induction Therapy</b> |         |                                |         | <b>Standard Timing Induction Therapy</b> |         |                                |         |
|                                                                   | <b>6vr Survival</b>  |         | <b>6vr Event-Free</b> |         | <b>6vr Survival</b>                       |         | <b>6vr Event-Free Survival</b> |         | <b>6vr Survival</b>                      |         | <b>6vr Event-Free Survival</b> |         |
|                                                                   | % (2SE)              | p-value | % (2SE)               | p-value | % (2SE)                                   | p-value | % (2SE)                        | p-value | % (2SE)                                  | p-value | % (2SE)                        | p-value |
| White                                                             | 48%<br>(4%)          | 0.003   | 36%<br>(4%)           | 0.077   | 49%<br>(5%)                               | 0.296   | 40%<br>(5%)                    | 0.971   | 44%<br>(7%)                              | 0.001   | 29%<br>(7%)                    | 0.028   |
| Black                                                             | 34%<br>(10%)         | 0.007   | 25%<br>(9%)           | 0.044   | 43%<br>(14%)                              | 0.377   | 40%<br>(14%)                   | 0.893   | 23%<br>(13%)                             | 0.005   | 9%<br>(9%)                     | 0.026   |
| Hispanic                                                          | 37%<br>(9%)          | 0.016   | 33%<br>(9%)           | 0.191   | 45%<br>(12%)                              | 0.286   | 42%<br>(12%)                   | 0.861   | 22%<br>(13%)                             | 0.011   | 17%<br>(12%)                   | 0.084   |
| Asian                                                             | 54%<br>(21%)         | 0.847   | 44%<br>(20%)          | 0.503   | 54%<br>(26%)                              | 0.676   | 44%<br>(25%)                   | 0.634   | 52%<br>(35%)                             | 0.860   | 44%<br>(33%)                   | 0.553   |
| <b>Overall</b>                                                    |                      |         |                       |         |                                           |         |                                |         |                                          |         |                                |         |
|                                                                   | <b>6 yr Survival</b> |         |                       |         | <b>6 yr Event-Free Survival</b>           |         |                                |         |                                          |         |                                |         |
|                                                                   | <b>Chemo.</b>        |         | <b>Auto BMT</b>       |         | <b>Allo BMT</b>                           |         | <b>Chemo.</b>                  |         | <b>Auto BMT</b>                          |         | <b>Allo BMT</b>                |         |
|                                                                   | % (2SE)              | p-value | % (2SE)               | p-value | % (2SE)                                   | p-value | % (2SE)                        | p-value | % (2SE)                                  | p-value | % (2SE)                        | p-value |
| White                                                             | 57%<br>(10%)         | 0.199   | 48%<br>(9%)           | 0.280   | 67%<br>(9%)                               | 0.057   | 43%<br>(10%)                   | 0.524   | 39%<br>(9%)                              | 0.562   | 55%<br>(9%)                    | 0.223   |
| Black                                                             | 32%<br>(19%)         | 0.038   | 38%<br>(21%)          | 0.205   | 50%<br>(41%)                              | 0.203   | 19%<br>(15%)                   | 0.044   | 35%<br>(20%)                             | 0.459   | 38%<br>(34%)                   | 0.092   |
| Hispanic                                                          | 57%<br>(21%)         | 0.981   | 35%<br>(24%)          | 0.344   | 54%<br>(20%)                              | 0.193   | 49%<br>(21%)                   | 0.608   | 37%<br>(23%)                             | 0.605   | 50%<br>(20%)                   | 0.647   |
| Asian                                                             | 50%<br>(32%)         | 0.792   | 100%<br>(0%)          | 0.204   | 60%<br>(44%)                              | 0.197   | 50%<br>(32%)                   | 0.574   | 67%<br>(54%)                             | 0.420   | 60%<br>(44%)                   | 0.522   |
| <b>Intensive Timing Induction Therapy</b>                         |                      |         |                       |         |                                           |         |                                |         |                                          |         |                                |         |
|                                                                   | <b>6 yr Survival</b> |         |                       |         | <b>6 yr Event-Free Survival</b>           |         |                                |         |                                          |         |                                |         |
|                                                                   | <b>Chemo.</b>        |         | <b>Auto BMT</b>       |         | <b>Allo BMT</b>                           |         | <b>Chemo.</b>                  |         | <b>Auto BMT</b>                          |         | <b>Allo BMT</b>                |         |
|                                                                   | % (2SE)              | p-value | % (2SE)               | p-value | % (2SE)                                   | p-value | % (2SE)                        | p-value | % (2SE)                                  | p-value | % (2SE)                        | p-value |
| White                                                             | 56%<br>(12%)         | 0.714   | 52%<br>(11%)          | 0.761   | 70%<br>(10%)                              | 0.387   | 45%<br>(12%)                   | 0.849   | 42%<br>(11%)                             | 0.602   | 59%<br>(11%)                   | 0.720   |
| Black                                                             | 31%<br>(26%)         | 0.160   | 50%<br>(29%)          | 0.765   | 67%<br>(54%)                              | 0.957   | 31%<br>(26%)                   | 0.369   | 50%<br>(29%)                             | 0.807   | 50%<br>(50%)                   | 0.576   |
| Hispanic                                                          | 61%<br>(23%)         | 0.737   | 48%<br>(28%)          | 0.472   | 60%<br>(25%)                              | 0.424   | 56%<br>(23%)                   | 0.603   | 49%<br>(27%)                             | 0.995   | 60%<br>(25%)                   | 0.985   |
| Asian                                                             | 57%<br>(37%)         | 0.738   | 100%<br>(0%)          | 0.252   | 50%<br>(71%)                              | 0.302   | 57%<br>(37%)                   | 0.432   | 100%<br>(0%)                             | 0.191   | 50%<br>(71%)                   | 0.571   |
| <b>Standard Timing Induction Therapy</b>                          |                      |         |                       |         |                                           |         |                                |         |                                          |         |                                |         |
|                                                                   | <b>6 yr Survival</b> |         |                       |         | <b>6 yr Event-Free Survival</b>           |         |                                |         |                                          |         |                                |         |
|                                                                   | <b>Chemo.</b>        |         | <b>Auto BMT</b>       |         | <b>Allo BMT</b>                           |         | <b>Chemo.</b>                  |         | <b>Auto BMT</b>                          |         | <b>Allo BMT</b>                |         |
|                                                                   | % (2SE)              | p-value | % (2SE)               | p-value | % (2SE)                                   | p-value | % (2SE)                        | p-value | % (2SE)                                  | p-value | % (2SE)                        | p-value |
| White                                                             | 58%<br>(16%)         | 0.088   | 34%<br>(16%)          | 0.436   | 62%<br>(16%)                              | 0.151   | 38%<br>(15%)                   | 0.160   | 29%<br>(15%)                             | 0.230   | 46%<br>(16%)                   | 0.382   |
| Black                                                             | 34%<br>(27%)         | 0.113   | 24%<br>(28%)          | 0.381   | 33%<br>(54%)                              | 0.125   | 8%<br>(15%)                    | 0.081   | 18%<br>(23%)                             | 0.402   | 25%<br>(43%)                   | 0.179   |
| Hispanic                                                          | 40%<br>(44%)         | 0.459   | 0%<br>(0%)            | 0.847   | 45%<br>(30%)                              | 0.358   | 20%<br>(36%)                   | 0.883   | 0%<br>(0%)                               | 0.384   | 36%<br>(29%)                   | 0.663   |
| Asian                                                             | 33%<br>(54%)         | 0.335   | 100%<br>(0%)          | 0.697   | 67%<br>(54%)                              | 0.636   | 33%<br>(54%)                   | 0.744   | 0%<br>(0%)                               | 0.391   | 67%<br>(54%)                   | 0.983   |

## Appendix 1: 2891 de novo patient outcomes from end of two courses

|          | Overall                                   |         |                  |         |                                   |         | Intensive Timing Induction Therapy |         |                                   |         |                  |         | Standard Timing Induction Therapy |         |                  |         |                  |         |
|----------|-------------------------------------------|---------|------------------|---------|-----------------------------------|---------|------------------------------------|---------|-----------------------------------|---------|------------------|---------|-----------------------------------|---------|------------------|---------|------------------|---------|
|          | 6yr Survival                              |         | 6yr Disease-Free |         | 6yr Relapse-Free                  |         | 6yr Survival                       |         | 6yr Disease-Free                  |         | 6yr Relapse-Free |         | 6yr Survival                      |         | 6yr Disease-Free |         | 6yr Relapse-Free |         |
|          | % (2SE)                                   | p-value | % (2SE)          | p-value | % (2SE)                           | p-value | % (2SE)                            | p-value | % (2SE)                           | p-value | % (2SE)          | p-value | % (2SE)                           | p-value | % (2SE)          | p-value | % (2SE)          | p-value |
| White    | 59%<br>(5%)                               | 0.009   | 47%<br>(5%)      | 0.105   | 52%<br>(5%)                       | 0.248   | 60%<br>(6%)                        | 0.317   | 50%<br>(6%)                       | 0.955   | 54%<br>(6%)      | 0.904   | 56%<br>(9%)                       | 0.008   | 40%<br>(9%)      | 0.028   | 45%<br>(9%)      | 0.106   |
| Black    | 43%<br>(12%)                              | 0.004   | 33%<br>(11%)     | 0.012   | 39%<br>(12%)                      | 0.042   | 53%<br>(17%)                       | 0.411   | 51%<br>(16%)                      | 0.997   | 54%<br>(17%)     | 0.928   | 29%<br>(17%)                      | 0.003   | 13%<br>(12%)     | 0.002   | 18%<br>(15%)     | 0.015   |
| Hispanic | 50%<br>(12%)                              | 0.137   | 46%<br>(12%)     | 0.772   | 52%<br>(12%)                      | 0.856   | 56%<br>(14%)                       | 0.364   | 54%<br>(14%)                      | 0.934   | 60%<br>(14%)     | 0.811   | 37%<br>(20%)                      | 0.226   | 29%<br>(19%)     | 0.595   | 36%<br>(20%)     | 0.582   |
| Asian    | 61%<br>(22%)                              | 0.775   | 42%<br>(23%)     | 0.931   | 49%<br>(26%)                      | 0.727   | 62%<br>(27%)                       | 0.936   | 50%<br>(27%)                      | 0.999   | 54%<br>(28%)     | 0.968   | 58%<br>(37%)                      | 0.650   | 33%<br>(36%)     | 0.974   | 46%<br>(45%)     | 0.536   |
|          | <b>Overall</b>                            |         |                  |         |                                   |         |                                    |         |                                   |         |                  |         |                                   |         |                  |         |                  |         |
|          | <b>6 yr Survival</b>                      |         |                  |         | <b>6 yr Disease-Free Survival</b> |         |                                    |         | <b>6 yr Relapse-Free Survival</b> |         |                  |         |                                   |         |                  |         |                  |         |
|          | <b>Chemo.</b>                             |         | <b>Auto BMT</b>  |         | <b>Allo BMT</b>                   |         | <b>Chemo.</b>                      |         | <b>Auto BMT</b>                   |         | <b>Allo BMT</b>  |         | <b>Chemo.</b>                     |         | <b>Auto BMT</b>  |         | <b>Allo BMT</b>  |         |
|          | % (2SE)                                   | p-value | % (2SE)          | p-value | % (2SE)                           | p-value | % (2SE)                            | p-value | % (2SE)                           | p-value | % (2SE)          | p-value | % (2SE)                           | p-value | % (2SE)          | p-value | % (2SE)          | p-value |
| White    | 58%<br>(10%)                              | 0.149   | 49%<br>(9%)      | 0.414   | 68%<br>(9%)                       | 0.078   | 44%<br>(10%)                       | 0.436   | 41%<br>(9%)                       | 0.608   | 56%<br>(9%)      | 0.299   | 46%<br>(10%)                      | 0.427   | 44%<br>(9%)      | 0.882   | 67%<br>(9%)      | 0.442   |
| Black    | 32%<br>(19%)                              | 0.028   | 42%<br>(22%)     | 0.320   | 60%<br>(44%)                      | 0.410   | 19%<br>(15%)                       | 0.033   | 38%<br>(21%)                      | 0.523   | 43%<br>(37%)     | 0.235   | 20%<br>(16%)                      | 0.023   | 46%<br>(23%)     | 0.933   | 71%<br>(34%)     | 0.997   |
| Hispanic | 57%<br>(21%)                              | 0.907   | 36%<br>(25%)     | 0.416   | 54%<br>(20%)                      | 0.190   | 49%<br>(21%)                       | 0.665   | 39%<br>(24%)                      | 0.597   | 50%<br>(20%)     | 0.650   | 51%<br>(21%)                      | 0.683   | 42%<br>(26%)     | 0.628   | 61%<br>(19%)     | 0.466   |
| Asian    | 50%<br>(32%)                              | 0.690   | 100%<br>(0%)     | 0.208   | 60%<br>(44%)                      | 0.189   | 50%<br>(32%)                       | 0.637   | 67%<br>(54%)                      | 0.437   | 30%<br>(48%)     | 0.506   | 56%<br>(33%)                      | 0.485   | 67%<br>(54%)     | 0.497   | 40%<br>(59%)     | 0.588   |
|          | <b>Intensive Timing Induction Therapy</b> |         |                  |         |                                   |         |                                    |         |                                   |         |                  |         |                                   |         |                  |         |                  |         |
|          | <b>6 yr Survival</b>                      |         |                  |         | <b>6 yr Disease-Free Survival</b> |         |                                    |         | <b>6 yr Relapse-Free Survival</b> |         |                  |         |                                   |         |                  |         |                  |         |
|          | <b>Chemo.</b>                             |         | <b>Auto BMT</b>  |         | <b>Allo BMT</b>                   |         | <b>Chemo.</b>                      |         | <b>Auto BMT</b>                   |         | <b>Allo BMT</b>  |         | <b>Chemo.</b>                     |         | <b>Auto BMT</b>  |         | <b>Allo BMT</b>  |         |
|          | % (2SE)                                   | p-value | % (2SE)          | p-value | % (2SE)                           | p-value | % (2SE)                            | p-value | % (2SE)                           | p-value | % (2SE)          | p-value | % (2SE)                           | p-value | % (2SE)          | p-value | % (2SE)          | p-value |
| White    | 57%<br>(12%)                              | 0.606   | 52%<br>(11%)     | 0.962   | 70%<br>(11%)                      | 0.575   | 46%<br>(13%)                       | 0.938   | 44%<br>(11%)                      | 0.462   | 59%<br>(11%)     | 0.983   | 50%<br>(13%)                      | 0.992   | 47%<br>(11%)     | 0.338   | 69%<br>(11%)     | 0.619   |
| Black    | 31%<br>(26%)                              | 0.133   | 55%<br>(30%)     | 0.992   | 100%<br>(0%)                      | 0.340   | 31%<br>(26%)                       | 0.319   | 55%<br>(30%)                      | 0.623   | 67%<br>(54%)     | 0.772   | 33%<br>(27%)                      | 0.326   | 61%<br>(31%)     | 0.491   | 67%<br>(54%)     | 0.954   |
| Hispanic | 61%<br>(23%)                              | 0.806   | 50%<br>(29%)     | 0.644   | 60%<br>(25%)                      | 0.432   | 56%<br>(23%)                       | 0.654   | 52%<br>(29%)                      | 0.938   | 60%<br>(25%)     | 0.993   | 59%<br>(24%)                      | 0.660   | 59%<br>(29%)     | 0.815   | 67%<br>(24%)     | 0.760   |
| Asian    | 57%<br>(37%)                              | 0.831   | 100%<br>(0%)     | 0.257   | 50%<br>(71%)                      | 0.303   | 57%<br>(37%)                       | 0.465   | 100%<br>(0%)                      | 0.201   | 50%<br>(71%)     | 0.571   | 57%<br>(37%)                      | 0.592   | 100%<br>(0%)     | 0.220   | 50%<br>(71%)     | 0.374   |
|          | <b>Standard Timing Induction Therapy</b>  |         |                  |         |                                   |         |                                    |         |                                   |         |                  |         |                                   |         |                  |         |                  |         |
|          | <b>6 yr Survival</b>                      |         |                  |         | <b>6 yr Disease-Free Survival</b> |         |                                    |         | <b>6 yr Relapse-Free Survival</b> |         |                  |         |                                   |         |                  |         |                  |         |
|          | <b>Chemo.</b>                             |         | <b>Auto BMT</b>  |         | <b>Allo BMT</b>                   |         | <b>Chemo.</b>                      |         | <b>Auto BMT</b>                   |         | <b>Allo BMT</b>  |         | <b>Chemo.</b>                     |         | <b>Auto BMT</b>  |         | <b>Allo BMT</b>  |         |
|          | % (2SE)                                   | p-value | % (2SE)          | p-value | % (2SE)                           | p-value | % (2SE)                            | p-value | % (2SE)                           | p-value | % (2SE)          | p-value | % (2SE)                           | p-value | % (2SE)          | p-value | % (2SE)          | p-value |
| White    | 59%<br>(16%)                              | 0.079   | 38%<br>(17%)     | 0.430   | 64%<br>(16%)                      | 0.144   | 38%<br>(16%)                       | 0.143   | 31%<br>(16%)                      | 0.213   | 48%<br>(16%)     | 0.378   | 35%<br>(16%)                      | 0.163   | 34%<br>(17%)     | 0.315   | 62%<br>(17%)     | 0.710   |
| Black    | 34%<br>(27%)                              | 0.110   | 30%<br>(29%)     | 0.409   | 33%<br>(54%)                      | 0.120   | 8%<br>(14%)                        | 0.070   | 20%<br>(25%)                      | 0.348   | 25%<br>(43%)     | 0.177   | 8%<br>(15%)                       | 0.053   | 25%<br>(31%)     | 0.653   | 75%<br>(43%)     | 0.859   |
| Hispanic | 40%<br>(44%)                              | 0.426   | 0%<br>(0%)       | 0.724   | 45%<br>(30%)                      | 0.358   | 20%<br>(36%)                       | 0.879   | 0%<br>(0%)                        | 0.346   | 36%<br>(29%)     | 0.683   | 20%<br>(36%)                      | 0.826   | 0%<br>(0%)       | 0.267   | 52%<br>(31%)     | 0.566   |
| Asian    | 33%<br>(54%)                              | 0.302   | 100%<br>(0%)     | 0.595   | 67%<br>(54%)                      | 0.596   | 33%<br>(54%)                       | 0.735   | 0%<br>(0%)                        | 0.650   | 33%<br>(54%)     | 0.928   | 50%<br>(71%)                      | 0.704   | 0%<br>(0%)       | 0.545   | 50%<br>(71%)     | 0.934   |

Relapse free survival (RFS) events were defined as leukemia relapse, secondary malignancy, or death due to progressive disease. Non-progressive disease death was censored for RFS analyses.
