# Supplementary material
Source: PubMed Central journal article supplement (PMC1895824)
Supplement: blood_2005-10-4004_2.pdf [file blood_2005-10-4004_2.pdf]

| Appendix 2: Outcome on CCG-2961 |     |                       |                |              |         |                            |         |              |         |                            |         |              |         |              |         |
|---------------------------------|-----|-----------------------|----------------|--------------|---------|----------------------------|---------|--------------|---------|----------------------------|---------|--------------|---------|--------------|---------|
| Outcome from end of two courses |     |                       |                |              |         |                            |         |              |         |                            |         |              |         |              |         |
|                                 | n   | 3 yr Overall Survival |                |              |         | 3 yr Disease Free Survival |         |              |         | 3 yr Relapse Free Survival |         |              |         |              |         |
|                                 |     | No Donor              |                | Donor        |         | No Donor                   |         | Donor        |         | No Donor                   |         | Donor        |         |              |         |
|                                 |     | No Donor              | Donor          | %<br>(2 SE)  | p-value | %<br>(2 SE)                | p-value | %<br>(2 SE)  | p-value | %<br>(2 SE)                | p-value | %<br>(2 SE)  | p-value | %<br>(2 SE)  | p-value |
| White                           | 405 | 282<br>(69.6%)        | 123<br>(30.5%) | 72%<br>(6%)  | 0.002   | 72%<br>(8%)                | 0.464   | 55%<br>(6%)  | 0.014   | 62%<br>(9%)                | 0.985   | 56%<br>(6%)  | 0.073   | 74%<br>(9%)  | 0.523   |
| Black                           | 57  | 53<br>(93.0%)         | 4<br>(7.0%)    | 50%<br>(15%) | <0.001  | 50%<br>(50%)               | 0.426   | 27%<br>(13%) | <0.001  | 67%<br>(54%)               | 0.831   | 29%<br>(14%) | 0.002   | 100%<br>(0%) | 0.384   |
| Hispanic                        | 97  | 75<br>(77.3%)         | 22<br>(22.7%)  | 65%<br>(12%) | 0.220   | 62%<br>(21%)               | 0.386   | 54%<br>(12%) | 0.721   | 55%<br>(22%)               | 0.572   | 58%<br>(13%) | 0.928   | 71%<br>(22%) | 0.845   |
| Asian                           | 15  | 10<br>(66.7%)         | 5<br>(33.3%)   | 50%<br>(32%) | 0.054   | 80%<br>(36%)               | 0.566   | 38%<br>(34%) | 0.136   | 80%<br>(36%)               | 0.355   | 43%<br>(37%) | 0.319   | 100%<br>(0%) | 0.215   |

Relapse free survival (RFS) events were defined as leukemia relapse, secondary malignancy, or death due to progressive disease. Non-progressive disease death was censored for RFS analyses.
